# Supplementary material for: Healthcare provider and patient/family perceptions of continuous pressure imaging technology for prevention of pressure injuries: A secondary analysis of patients enrolled in a randomized control trial
Source: PubMed Central journal article supplement (PMC9707747; doi:10.1371/journal.pone.0278019), 2022-11-29
Supplement: pone.0278019.s002.pdf [file pone.0278019.s002.pdf]

Record ID: \_\_\_\_\_

### Patient Perceptions to a Pressure-Sensing Mattress System

Thank you for participating in this study. Please take 5 minutes to complete this survey, which will help our research team understand what you thought about the pressure-sensing mattress system, and how it influenced care provided by healthcare providers.

1. Specify the person filling out this form.

- Patient
- Proxy: \_\_\_\_\_

2. Has a pressure-sensing mattress system been used for you/the patient before?

- Yes
- No

3. Please answer the following by checking one of the numbered choices:

|                                                                                   | Strongly Disagree             | Disagree                      | Neither Disagree or Agree     | Agree                         | Strongly Agree                |
|-----------------------------------------------------------------------------------|-------------------------------|-------------------------------|-------------------------------|-------------------------------|-------------------------------|
| The sensor mat was comfortable to lie/sleep on.                                   | 1<br><input type="checkbox"/> | 2<br><input type="checkbox"/> | 3<br><input type="checkbox"/> | 4<br><input type="checkbox"/> | 5<br><input type="checkbox"/> |
| The sensor mat moved significantly when laid/slept on.                            | 1<br><input type="checkbox"/> | 2<br><input type="checkbox"/> | 3<br><input type="checkbox"/> | 4<br><input type="checkbox"/> | 5<br><input type="checkbox"/> |
| The pressure relief provided by the nurse was positively influenced by the system | 1<br><input type="checkbox"/> | 2<br><input type="checkbox"/> | 3<br><input type="checkbox"/> | 4<br><input type="checkbox"/> | 5<br><input type="checkbox"/> |

4. Did you or the patient request that the sensor mat be removed?

- Yes
- No

5. Did you or the patient request that the LCD monitor be turned off?

- Yes
- No

Record ID: \_\_\_\_\_

6. Additional comments:

---

---

---
